# Supplementary material for: Formation and Dynamics of Waves in a Cortical Model of Cholinergic Modulation
Source: PubMed Central journal article supplement (PMC4546669; doi:10.1371/journal.pcbi.1004449), 2015-08-21
Supplement: pcbi.1004449.s008.pdf [file pcbi.1004449.s008.pdf]

| <b>Neural parameters</b>  |                  |                       |                   |
|---------------------------|------------------|-----------------------|-------------------|
| $c_m$                     | $1.0 \mu F/cm^2$ | $g\bar{K}_s$          | $0-1.5 mS/cm^2$   |
| $g\bar{N}_a$              | $24.0 mS/cm^2$   | $g_L$                 | $0.02 mS/cm^2$    |
| $g\bar{K}_{dir}$          | $3.0 mS/cm^2$    | $E_{Na}$              | $55.0 mV$         |
| $E_K$                     | $-90.0 mV$       | $E_L$                 | $-60.0 mV$        |
| $\alpha_m$                | $-30 mV$         | $\alpha_h$            | $53 mV$           |
| $\alpha_n$                | $-30 mV$         | $\alpha_s$            | $-39 mV$          |
| $\beta_m$                 | $9.5 mV$         | $\beta_h$             | $7 mV$            |
| $\beta_n$                 | $10 mV$          | $\beta_s$             | $5 mV$            |
| $\gamma_h$                | $40.5 mV$        | $\gamma_n$            | $27 mV$           |
| $\varepsilon_h$           | $6 mV$           | $\varepsilon_n$       | $15 mV$           |
| $D_h$                     | $2.78$           | $D_n$                 | $1.85$            |
| $V_{threshold}$           | $-20 mV$         |                       |                   |
| <b>Synapse parameters</b> |                  |                       |                   |
| $\tau_F$                  | $0.3 ms$         | $\tau_S$              | $3 ms$            |
| $E_e$                     | $0 mV$           | $E_i$                 | $-75 mV$          |
| $\tau_D$                  | $-75 mV$         |                       |                   |
| <b>Network parameters</b> |                  |                       |                   |
| $w_{e \rightarrow e}$     | $20 \mu S/cm^2$  | $w_{i \rightarrow e}$ | $0-38 \mu S/cm^2$ |
| $w_{e \rightarrow i}$     | $20 \mu S/cm^2$  | $w_{i \rightarrow i}$ | $20 \mu S/cm^2$   |
| $L$                       | $25 units$       | $Grain_e$             | $1 unit$          |
| $Grain_i$                 | $2.27 units$     | $k_{ee}$              | $16$              |
| $k_{ei}$                  | $4$              |                       |                   |
